# Supplementary material for: Risk of post-discharge fall-related injuries among adult patients with syncope: A nationwide cohort study
Source: PubMed Central journal article supplement (PMC6248940; doi:10.1371/journal.pone.0206936), 2018-11-21
Supplement: pone.0206936.s001.pdf [file pone.0206936.s001.pdf]

**S1 Table. Specific codes used to describe the study population and to identify endpoints**

|                                        | <b>Defined from</b>              | <b>Codes used</b>                                                                                                                                  |
|----------------------------------------|----------------------------------|----------------------------------------------------------------------------------------------------------------------------------------------------|
| Syncope                                | Diagnosis codes                  | (ICD8: 7802) ICD10: R55.9                                                                                                                          |
| <b>Comorbidity and pharmacotherapy</b> |                                  |                                                                                                                                                    |
| Ischemic heart disease including MI    | Diagnosis codes                  | ICD10: I20-25                                                                                                                                      |
| Cerebral vascular disease              | Diagnosis codes                  | ICD10: I60-69                                                                                                                                      |
| Heart failure                          | Diagnosis codes                  | ICD10: I110, I130, I132, I42, I50                                                                                                                  |
| Peripheral vascular disease            | Diagnosis codes                  | ICD10: I70, I74                                                                                                                                    |
| AV block and LBBB                      | Diagnosis codes                  | ICD10: I44                                                                                                                                         |
| Arrhythmia                             | Diagnosis codes                  | ICD10: I47-49                                                                                                                                      |
| Aortic stenosis                        | Diagnosis codes                  | ICD10: I350, I352                                                                                                                                  |
| Diabetes mellitus                      | Diagnosis codes or prescriptions | ICD10: E10-E14; ATC: A10                                                                                                                           |
| Cardiac pacemaker                      | Surgical procedure codes         | NCSP: BFCA0-2, KFPE0-2, KFPF0-2                                                                                                                    |
| Depression                             | Diagnosis codes or prescriptions | ICD10: F32-33; ATC: N06A                                                                                                                           |
| Cancer                                 | Diagnosis codes                  | ICD10: C00-C96                                                                                                                                     |
| Dementia                               | Diagnosis codes or prescriptions | ICD10: G30; ATC: N06D                                                                                                                              |
| Parkinson disease                      | Diagnosis codes or prescriptions | ICD10: G20; ATC: N04                                                                                                                               |
| Osteoporosis                           | Diagnosis codes or prescriptions | ICD10: M80-M85; ATC: M05B                                                                                                                          |
| Loop diuretic drugs                    | Prescriptions                    | ATC: C03CA                                                                                                                                         |
| Antihypertensive drugs                 | Prescriptions                    | ATC: C02A-C, C02DA, C02L, C02DB, C02DD, C02DG, C03A-B, C03D-E, C03X, C07A-D, C07F, C08, C09AA, C09BA, C09BB, C09CA, C09DA, C09DB, C09XA02, C09XA52 |
| Anxiolytic drugs                       | Prescriptions                    | ATC: N05BA, N05CF                                                                                                                                  |
| <b>Endpoints</b>                       |                                  |                                                                                                                                                    |
| Fractures                              | Diagnosis codes                  | ICD10: S720-729, S321-325, S520-529, S620-628, S420-429                                                                                            |
| Head injury, major                     | Diagnosis codes                  | ICD10: S02, S061-069                                                                                                                               |
| Head injury, minor                     | Diagnosis codes                  | ICD10: S00, S01, S060, S07                                                                                                                         |

Abbreviations: ICD (International Classification of Diseases system, 10th revision), NCSP (NOMESCO Classification of Surgical Procedures), ATC (Anatomical Therapeutic Chemical system), MI (myocardial infarction), AV block (atrioventricular block), LBBB (left bundle branch block)
