# Supplementary material for: Risk of post-discharge fall-related injuries among adult patients with syncope: A nationwide cohort study
Source: PubMed Central journal article supplement (PMC6248940; doi:10.1371/journal.pone.0206936), 2018-11-21
Supplement: pone.0206936.s002.pdf [file pone.0206936.s002.pdf]

**S2 Table. Summary of fall-related injuries within one year<sup>a</sup>**

| <b>Syncope (n=125,763)</b>     | <b>Total</b> | <b>Age &lt;50 y</b> | <b>Age 50-64 y</b> | <b>Age 65-79 y</b> | <b>Age ≥80 y</b> |
|--------------------------------|--------------|---------------------|--------------------|--------------------|------------------|
| Any fall-related injury        | 8394 (100.0) | 1882 (100.0)        | 1282 (100.0)       | 2226 (100.0)       | 3004 (100.0)     |
| Minor head injury <sup>b</sup> | 3913 (46.6)  | 1232 (65.5)         | 653 (50.9)         | 924 (41.5)         | 1104 (36.8)      |
| Wrist or forearm fracture      | 1491 (17.8)  | 407 (21.6)          | 260 (20.3)         | 399 (17.9)         | 425 (14.1)       |
| Shoulder or upper arm fracture | 822 (9.8)    | 80 (4.3)            | 166 (12.9)         | 278 (12.5)         | 298 (9.9)        |
| Major head injury <sup>c</sup> | 562 (6.7)    | 137 (7.3)           | 89 (6.9)           | 166 (7.5)          | 170 (5.7)        |
| Hip fracture                   | 1606 (19.1)  | 26 (1.4)            | 114 (8.9)          | 459 (20.6)         | 1007 (33.5)      |
| <b>No syncope (n=125,763)</b>  | <b>Total</b> | <b>Age &lt;50 y</b> | <b>Age 50-64 y</b> | <b>Age 65-79 y</b> | <b>Age ≥80 y</b> |
| Any fall-related injury        | 4049 (100.0) | 669 (100.0)         | 477 (100.0)        | 986 (100.0)        | 1917 (100.0)     |
| Minor head injury <sup>b</sup> | 1383 (34.2)  | 344 (51.4)          | 195 (40.9)         | 291 (29.5)         | 553 (28.8)       |
| Wrist or forearm fracture      | 1040 (25.7)  | 245 (36.6)          | 169 (35.4)         | 284 (28.8)         | 342 (17.8)       |
| Shoulder or upper arm fracture | 428 (10.6)   | 29 (4.3)            | 63 (13.2)          | 136 (13.8)         | 200 (10.4)       |
| Major head injury <sup>c</sup> | 182 (4.5)    | 44 (6.6)            | 19 (4.0)           | 41 (4.2)           | 78 (4.1)         |
| Hip fracture                   | 1016 (25.1)  | 7 (1.0)             | 31 (6.5)           | 234 (23.7)         | 744 (38.8)       |

<sup>a</sup>Age refers to age at inclusion

<sup>b</sup>Defined as concussion, superficial contusion, or wound

<sup>c</sup>Defined as skull fracture or traumatic intracranial bleeding
