# Supplementary material for: Risk of post-discharge fall-related injuries among adult patients with syncope: A nationwide cohort study
Source: PubMed Central journal article supplement (PMC6248940; doi:10.1371/journal.pone.0206936), 2018-11-21

**Subgroups****No. events observed | No. subjects****Syncope****No syncope****ARR****[95%CI]**

|                             |      |         |      |         |                  |
|-----------------------------|------|---------|------|---------|------------------|
| Cardiovascular disease      | 3203 | 40,659  | 1009 | 20,031  | 1.53 [1.42-1.64] |
| No cardiovascular disease   | 5191 | 85,104  | 3040 | 105,732 | 1.86 [1.77-1.96] |
| Arrhythmia                  | 1265 | 15,673  | 369  | 6679    | 1.46 [1.30-1.65] |
| No arrhythmia               | 7129 | 110,090 | 3680 | 119,084 | 1.84 [1.76-1.92] |
| Pacemaker                   | 269  | 3700    | 60   | 937     | 1.19 [0.89-1.59] |
| No pacemaker                | 8125 | 122,063 | 3989 | 124,826 | 1.81 [1.73-1.88] |
| Loop diuretic               | 1542 | 17,910  | 709  | 11,330  | 1.44 [1.31-1.58] |
| No loop diuretic            | 6852 | 107,853 | 3340 | 114,433 | 1.82 [1.79-1.96] |
| Depression                  | 2395 | 22,415  | 861  | 12,806  | 1.63 [1.51-1.76] |
| No depression               | 5999 | 103,348 | 3188 | 112,957 | 1.84 [1.75-1.93] |
| Fall-injury in past 12 m    | 1470 | 7912    | 438  | 3774    | 1.51 [1.36-1.67] |
| No fall-injury in past 12 m | 6924 | 117,851 | 3611 | 121,989 | 1.75 [1.67-1.83] |

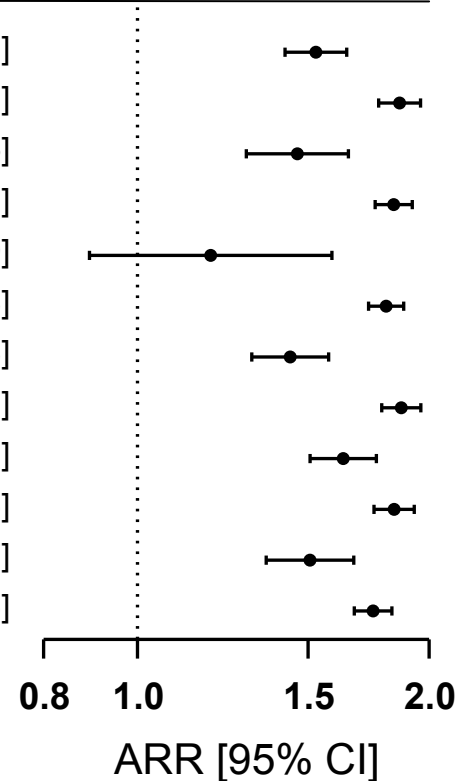

Supplement: pone.0206936.s003.pdf [file pone.0206936.s003.pdf]
