# Supplementary material for: Risk of post-discharge fall-related injuries among adult patients with syncope: A nationwide cohort study
Source: PubMed Central journal article supplement (PMC6248940; doi:10.1371/journal.pone.0206936), 2018-11-21

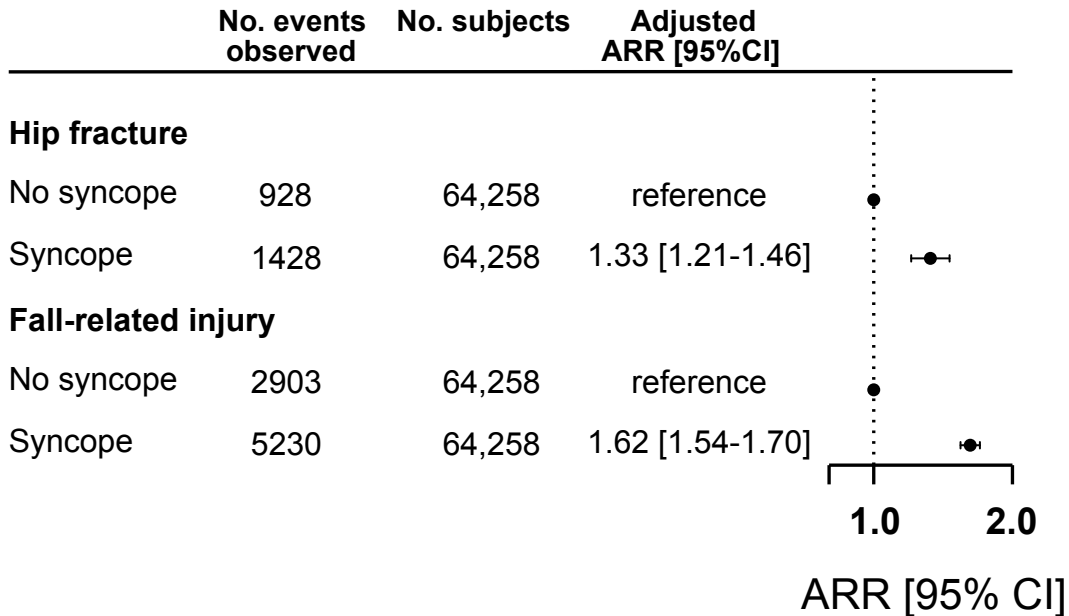

Supplement: pone.0206936.s004.pdf [file pone.0206936.s004.pdf]
